# Supplementary material for: In situ forming asymmetric bi-functional gel polymer electrolyte in lithium–sulfur batteries
Source: Royal Society of Chemistry journal article supplement (doi:10.1039/d1ta06007d), 2021-01-01
Supplement: d1ta06007d1.pdf [file d1ta06007d1.pdf]

## ***In-situ* Forming Asymmetric Bi-functional Gel Polymer Electrolyte in Lithium-Sulfur Batteries**

Yu-Jie Yang<sup>1</sup>, Rui Wang<sup>1</sup>, Jin-Xin Xue<sup>1</sup>, Feng-Quan Liu<sup>2,\*</sup>, Jun Yan<sup>1</sup>, Si-Xin Jia<sup>1</sup>, Tian-  
Qi Xiang<sup>1</sup>, Hong Huo<sup>1</sup>, Jian-Jun Zhou<sup>1,\*</sup>, Lin Li<sup>1,2,\*</sup>

<sup>1</sup> Beijing Key Laboratory of Energy Conversion and Storage Materials, College of  
Chemistry, Beijing Normal University, Beijing, China 100875

<sup>2</sup> College of Textiles & Clothing, State Key Laboratory of Bio-Fibers and Eco-Textiles,  
Qingdao University, Qingdao, China 266071

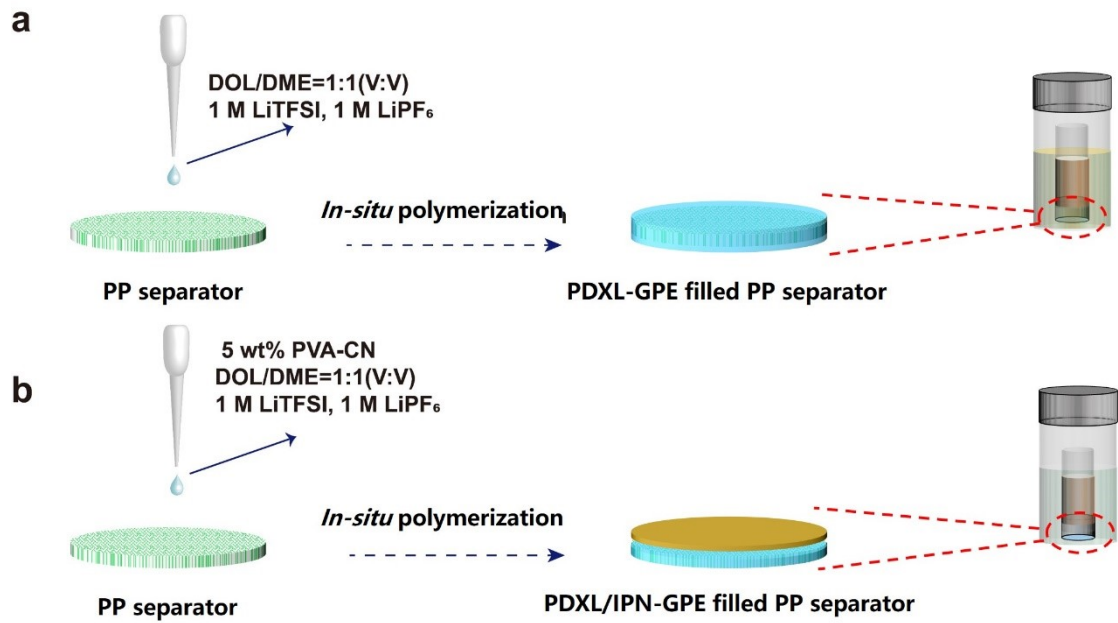

**Fig. S1** The schematic diagrams of preparing PDXL-GPE and PDXL/IPN-GPE filled PP separator for UV-vis spectra.

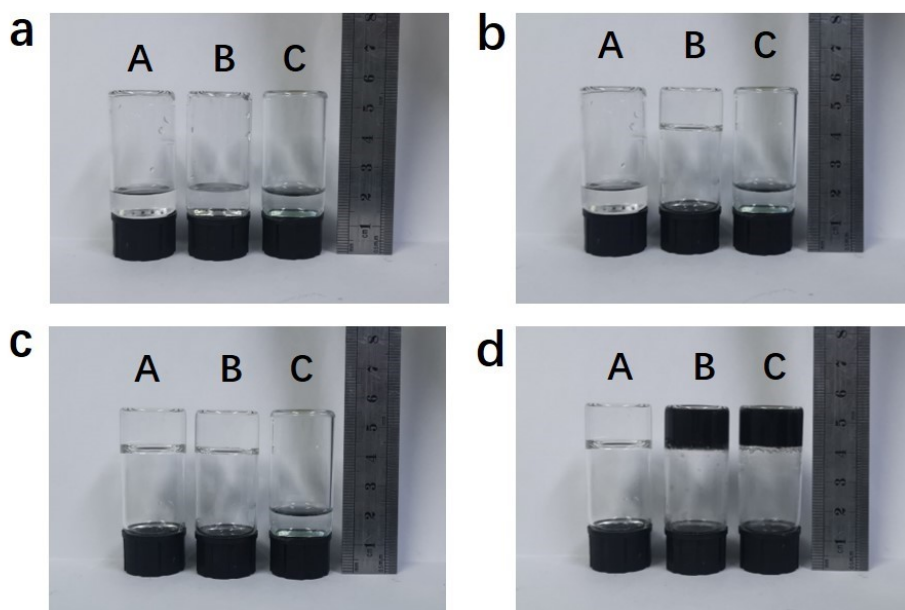

**Fig. S2** The photos of gelation process. Precursor solutions after (a) 0 hour, (b) 12 hours, (c) 24 hours at room temperature and (d) after 6 hours at 70 °C. *A*: 1 M LiPF<sub>6</sub> and 1.0 M LiTFSI in DOL/DME (1:1, v/v), *B*: *A*+5 wt% PVA-CN, *C*: *B* without DOL.

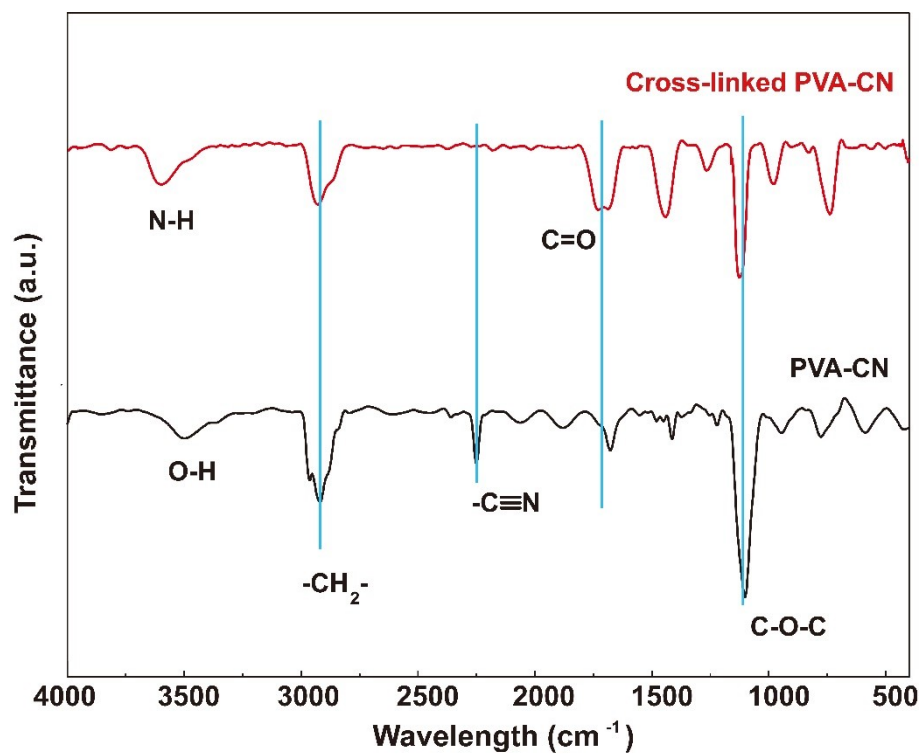

**Fig. S3** The FTIR spectra of PVA-CN (black line) and cross-linked PVA-CN (red line).

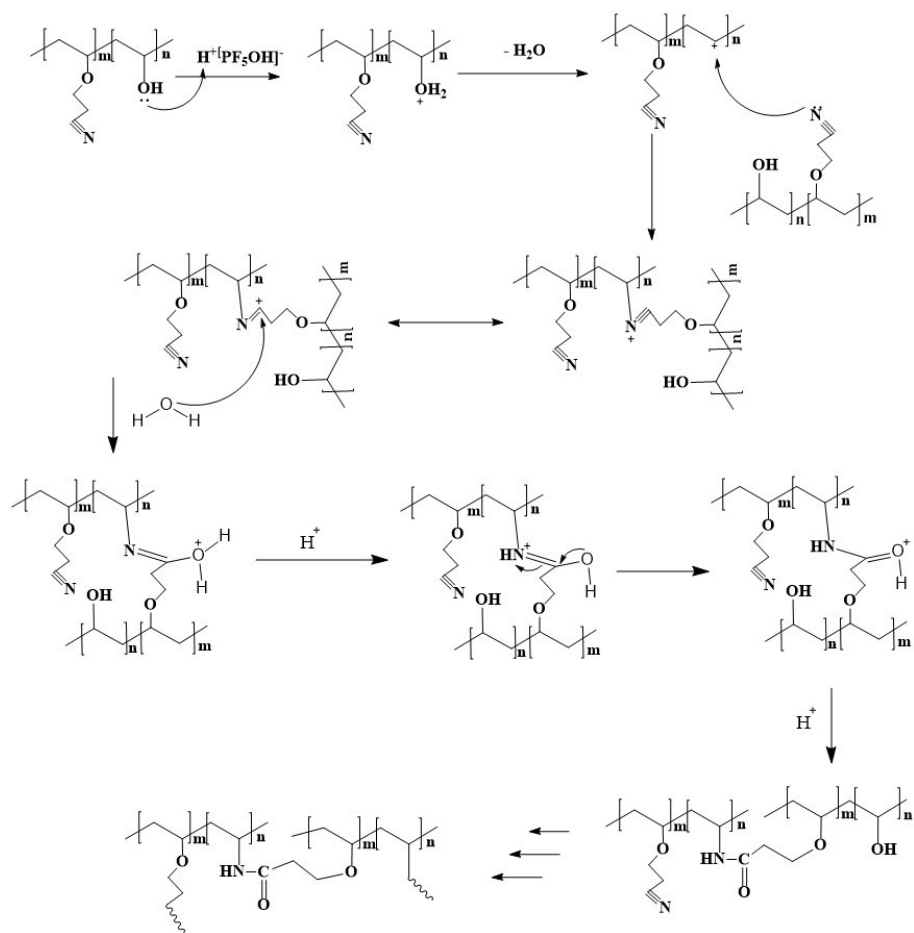

**Fig. S4** Possible reaction procedures following Ritter reaction mechanism.

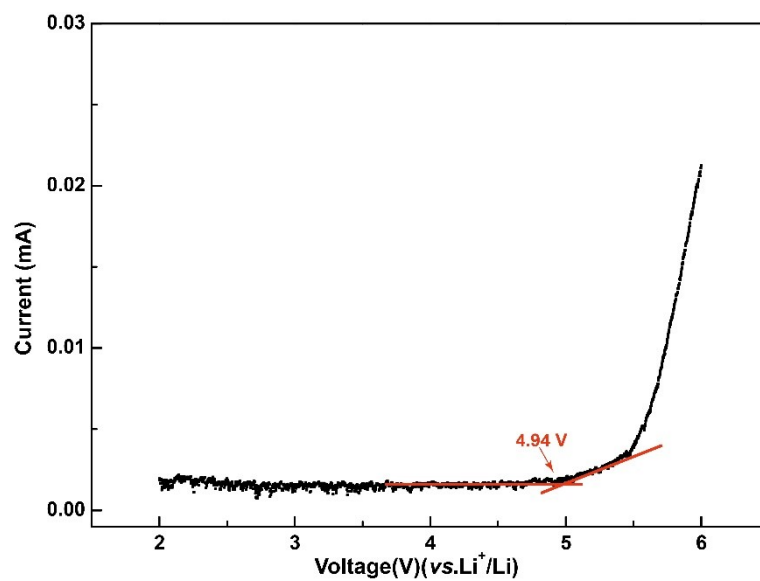

**Fig. S5** The LSV of IPN-GPE at a scanning rate of  $0.1 \text{ mV s}^{-1}$ .

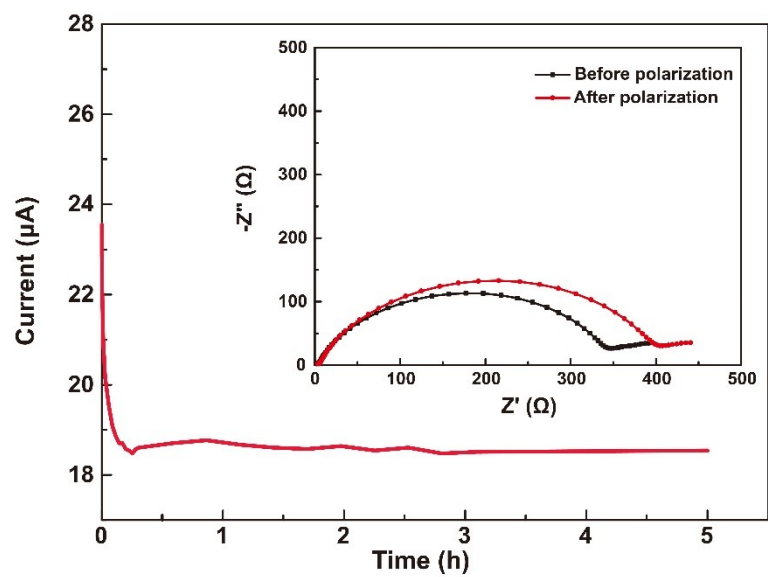

**Fig. S6** The chronoamperometry profiles of the symmetric Li|PDXL-GPE|Li cell under a polarization voltage of 10 mV, and the EISs before and after polarization (inset).

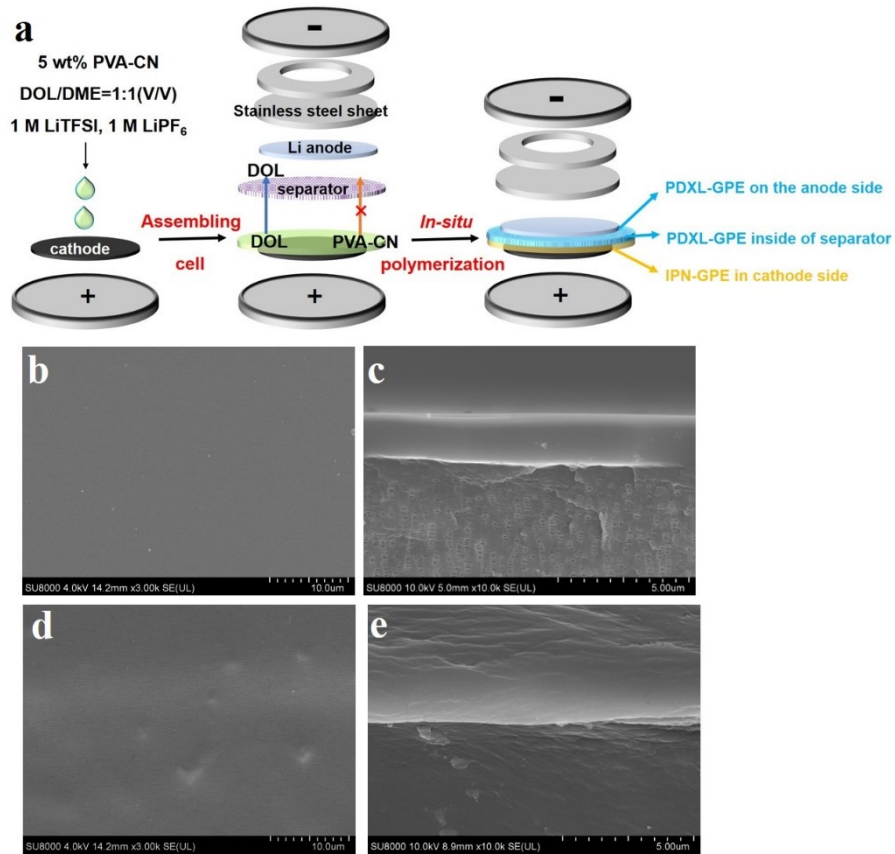

**Fig. S7** (a) The schematic illustration of Li-S cells with the asymmetric GPE. (b) Surface and (c) cross-section of cross-linked PVA-CN-GPE on the surface of PP separator with the gelation of LE(C). (d) Surface and (e) cross-section of PDXL/IPN-GPE filled PP separator with the gelation of LE(B).



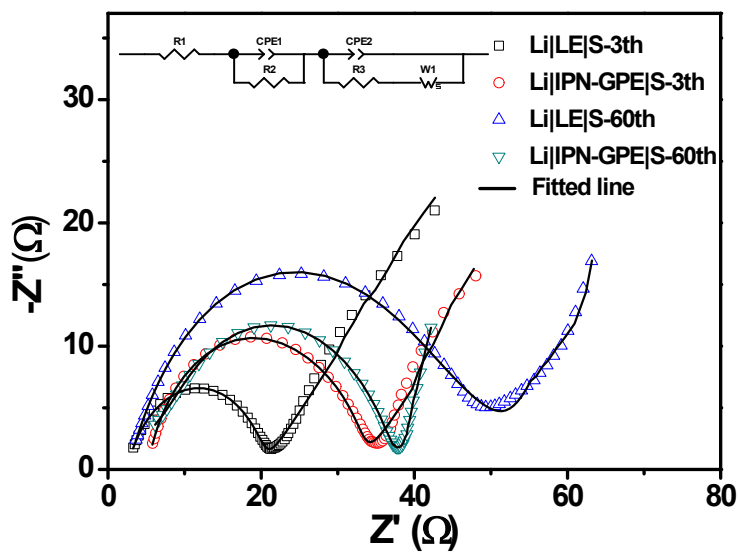

**Fig. S8** Nyquist profiles and fitted EIS plots of the Li|LE|S and Li|IPN-GPE|S batteries after the first 3 cycle's activation at 0.1 C and 60 cycles at 0.5 C.

**Table S1** EIS fitted results of Li-S batteries

| Cycle number | Li LE S       |                   |                  | Li IPN-GPE S  |                   |                  |
|--------------|---------------|-------------------|------------------|---------------|-------------------|------------------|
|              | $R_b, \Omega$ | $R_{SEI}, \Omega$ | $R_{ct}, \Omega$ | $R_b, \Omega$ | $R_{SEI}, \Omega$ | $R_{ct}, \Omega$ |
| 3th          | 2.3           | 8.0               | 9.8              | 5.1           | 1.3               | 25.2             |
| 60th         | 2.3           | 18.9              | 33.4             | 3.5           | 2.9               | 30.8             |

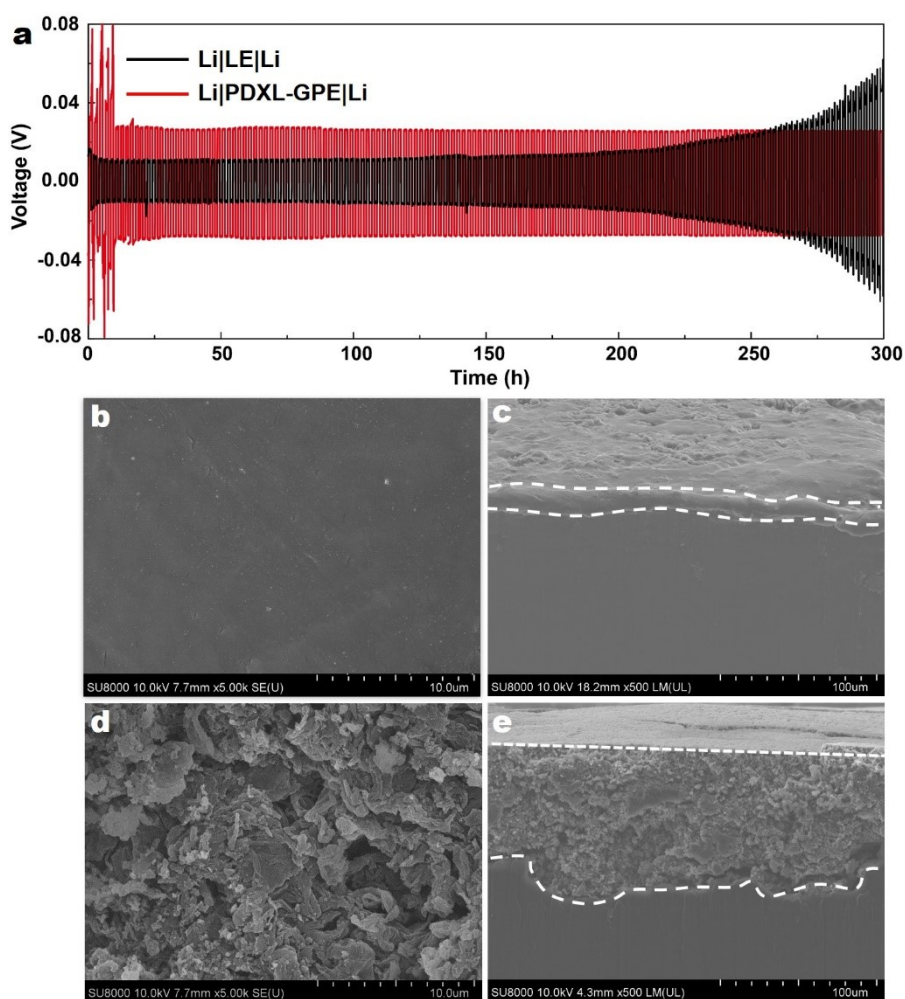

**Fig. S9** (a) Voltage profiles of Li||Li symmetric cells with LE and PDXL-GPE at  $1.0 \text{ mA cm}^{-2}$  and  $1.0 \text{ mAh cm}^{-2}$ . (b) Surface and (c) cross-sectional SEM images of Li metal anodes in Li|PDXL-GPE|Li cells after 150 cycles. (d) Surface and (e) cross-sectional SEM images of Li metal anodes in Li|LE|Li cells after 150 cycles.

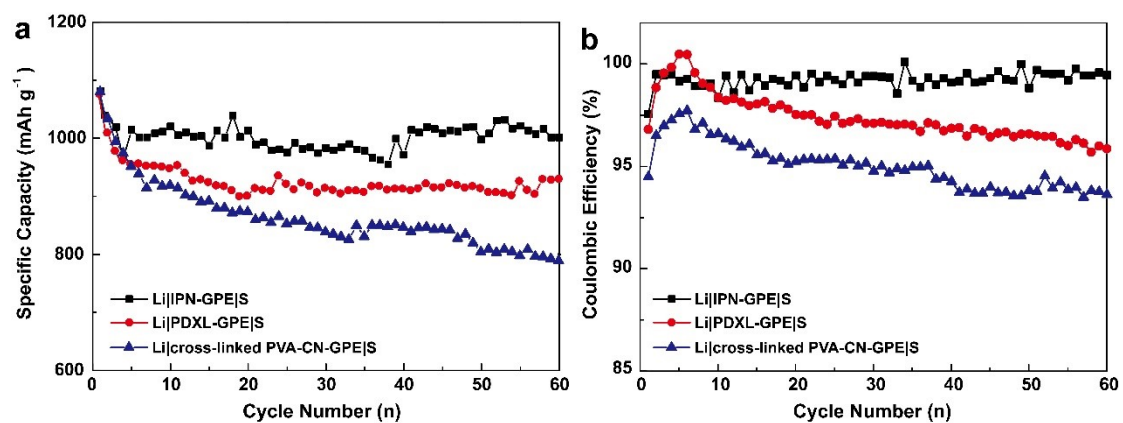

**Fig. S10** (a) Cycling performances and (b) CEs of Li|IPN-GPE|S, Li|PDXL-GPE|S and Li|cross-linked PVA-CN-GPE|S batteries at 0.1 C for the first three cycles and 0.5 C for the later cycles.
